# Supplementary material for: Solvent effects on the triplet–triplet annihilation upconversion of diiodo-Bodipy and perylene
Source: Royal Society of Chemistry journal article supplement (doi:10.1039/c6cp06897a), 2016-12-05
Supplement: c6cp06897a1.pdf [file c6cp06897a1.pdf]

# Solvent Effect on Triplet-Triplet Annihilation Upconversion of diiodo-Bodipy and Perylene

Qiaohui Zhou,<sup>1</sup> Miaomiao Zhou,<sup>2</sup> Yaxiong Wei,<sup>1</sup> Xiaoguo Zhou,<sup>1,3,‡</sup> Shilin Liu<sup>1,3</sup>,  
Song Zhang<sup>2,‡</sup>, Bing Zhang<sup>2</sup>

## Supporting information

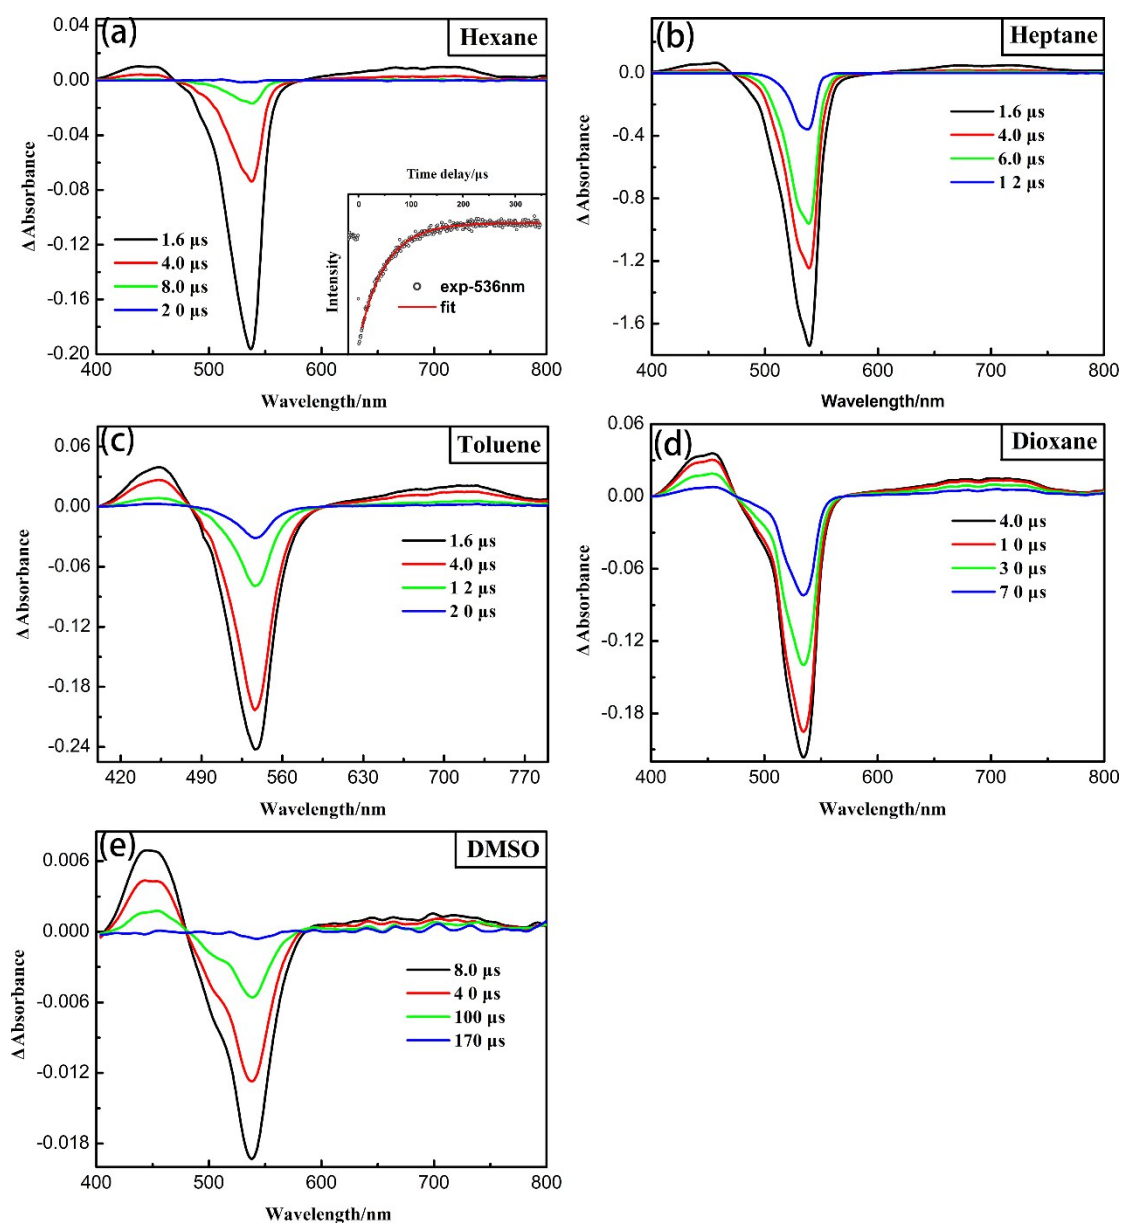

Fig S1. Nanosecond time-resolved transient absorption spectra of I<sub>2</sub>-Bodipy in hexane

(a), heptane (b), toluene (c), dioxane (d), dmso (e).  $\lambda_{\text{ex}} = 532 \text{ nm}$ ,  $c = 1 \times 10^{-5} \text{ M}$ .

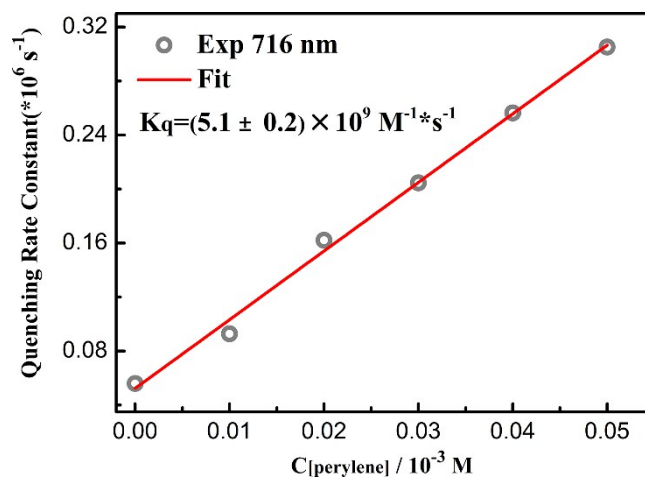

Fig S2. Bimolecular quenching rate constants  $k_q$  in the presence of perylene in toluene with fixed concentration of I<sub>2</sub>-Bodipy ( $5.0 \times 10^{-6}$  M).  $\lambda_{ex} = 532$  nm

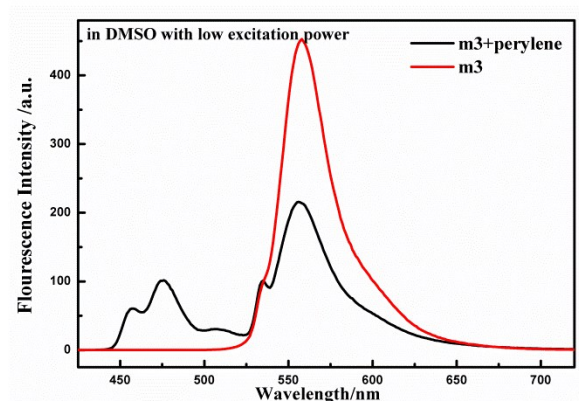

Fig S3. The prompt and delayed fluorescence spectra of I<sub>2</sub>-Bodipy and perylene system, where the red line is the prompt fluorescence spectrum of I<sub>2</sub>-Bodipy alone and the black is the delayed fluorescence spectrum at  $\lambda_{ex} = 532$  nm. [I<sub>2</sub>-Bodipy]= $5 \times 10^{-6}$  M, and [perylene]= $3 \times 10^{-4}$  M.
